# Supplementary material for: Ultradeep analysis of tumor heterogeneity in regions of somatic hypermutation
Source: PubMed Central journal article supplement (PMC4395979; doi:10.1186/s13073-015-0147-1), 2015-03-12
Supplement: 13073_2015_147_MOESM4_ESM.pdf [file 13073_2015_147_MOESM4_ESM.pdf]

**Table AF1.** SNV identified by DDiMAP according to sample type and gene target, with *BCL2* and *BCL6* showing differential mutation rates between FL specimens and non-malignant lymph node controls.

| Targets                          | Follicular Lymphoma Specimens |       |       |       |       |       |       |       |       |       |       |       | Controls:   |       |       |           | Total SNVs |
|----------------------------------|-------------------------------|-------|-------|-------|-------|-------|-------|-------|-------|-------|-------|-------|-------------|-------|-------|-----------|------------|
|                                  | 126                           | 127   | 128   | 129   | 131   | 132   | 133   | 134   | 135   | 136   | 137   | 139   | Reactive LN |       |       | Cell line |            |
|                                  | 140                           | 155   | 158   | 293   |       |       |       |       |       |       |       |       |             |       |       |           |            |
| <b>SNV not IGH at AID motif*</b> | 41                            | 18    | 190   | 57    | 30    | 81    | 15    | 90    | 15    | 54    | 29    | 39    | 6           | 9     | 4     | 9         | 686        |
| <b>Total SNV</b>                 | 21                            | 6     | 107   | 27    | 15    | 38    | 4     | 50    | 9     | 29    | 12    | 19    | 2           | 1     | 1     | 1         | 342        |
|                                  | 310                           | 102   | 242   | 192   | 153   | 306   | 181   | 527   | 112   | 266   | 219   | 50    | NA          | NA    | NA    | NA        | 2670       |
| <b>BCL2</b>                      | 23                            | 2     | 101   | 35    | 17    | 36    | 5     | 54    | 4     | 37    | 9     | 17    | 0           | 0     | 0     | 0         | 340        |
| <b>% freqMFC@</b>                | 10%                           | 14%   | 24%   | 20%   | 25%   | 20%   | 20%   | 11%   | 10%   | 45%   | 30%   | 30%   |             |       |       |           |            |
| <b>≥MFC</b>                      | 15                            | 2     | 54    | 33    | 10    | 29    | 5     | 13    | 4     | 11    | 8     | 17    |             |       |       |           | 201        |
| <b>≤3%</b>                       | 4                             | 0     | 30    | 0     | 7     | 7     | 0     | 41    | 0     | 23    | 1     | 0     |             |       |       |           | 113        |
| <b>≤1%</b>                       | 1                             | 0     | 24    | 0     | 6     | 3     | 0     | 24    | 0     | 20    | 1     | 0     |             |       |       |           | 79         |
| <b>BCL6</b>                      | 5                             | 2     | 39    | 3     | 5     | 7     | 2     | 13    | 3     | 3     | 5     | 6     | 0           | 0     | 0     | 4         | 99         |
| <b>RHOH</b>                      | 4                             | 2     | 16    | 2     | 2     | 4     | 1     | 3     | 1     | 2     | 1     | 1     | 1           | 0     | 0     | 1         | 42         |
| <b>PAX5</b>                      | 2                             | 1     | 6     | 0     | 2     | 7     | 1     | 5     | 1     | 4     | 1     | 2     | 0           | 0     | 0     | 1         | 33         |
| <b>IGH-enh</b>                   | 0                             | 3     | 9     | 14    | 0     | 17    | 1     | 12    | 4     | 4     | 11    | 8     | 1           | 1     | 2     | 0         | 85         |
| <b>CD83</b>                      | 1                             | 1     | 7     | 0     | 0     | 2     | 2     | 0     | 1     | 0     | 1     | 1     | 1           | 0     | 0     | 0         | 16         |
| <b>MYC TSS-1</b>                 | 4                             | 2     | 0     | 1     | 1     | 2     | 0     | 1     | 0     | 3     | 1     | 2     | 1           | 2     | 2     | 2         | 23         |
| <b>MYC TSS-2</b>                 | 2                             | 4     | 1     | 1     | 2     | 2     | 1     | 1     | 0     | 0     | 0     | 0     | 0           | 2     | 0     | 0         | 15         |
| <b>PIM1</b>                      | 0                             | 1     | 11    | 0     | 0     | 4     | 2     | 1     | 0     | 0     | 0     | 2     | 0           | 2     | 0     | 1         | 23         |
| <b>SYK</b>                       | 1                             | 0     | 0     | 1     | 1     | 0     | 0     | 0     | 1     | 1     | 0     | 0     | 2           | 2     | 0     | 0         | 9          |
| <b>IGH<sup>€</sup></b>           | 269                           | 84    | 52    | 135   | 123   | 225   | 166   | 437   | 97    | 212   | 190   | 11    | NA          | NA    | NA    | NA        | 2001       |
| <b>Total bases</b>               | 11756                         | 12233 | 11853 | 11752 | 11389 | 11952 | 11449 | 11927 | 11789 | 12630 | 11719 | 11727 | 10129       | 10129 | 10129 | 10129     |            |

\* excludes IGH results

@ frequency of most frequent clone (MFC) based on minimum estimate from *BCL2*

€ IGH SNV data reflects differences from the specimen-specific Sanger-level IGH sequence, not from germline reference sequence.

Gene regions as described in methods.

TSS – Transcription Start Site

| A                  | Non-mutated<br>C + G | SNV at<br>C + G | Totals |
|--------------------|----------------------|-----------------|--------|
| C + G<br>AID motif | 537                  | 51              | 588    |
| C + G<br>Non-motif | 3450                 | 78              | 3528   |
| Total<br>C + G     | 3987                 | 129             | 4116   |

p < 0.0001

| D                  | Non-mutated<br>A + T | SNV at<br>A + T | Totals |
|--------------------|----------------------|-----------------|--------|
| A + T<br>WA/TW     | 2944                 | 152             | 3096   |
| A + T<br>Non-motif | 2343                 | 57              | 2400   |
| Total<br>A + T     | 5287                 | 209             | 5496   |

p < 0.0001

| B                  | Non-mutated<br>C + G | SNV<br>≥15%<br>C + G | Totals |
|--------------------|----------------------|----------------------|--------|
| C + G<br>AID motif | 560                  | 28                   | 588    |
| C + G<br>Non-motif | 3487                 | 41                   | 3528   |
| Total<br>C + G     | 3987                 | 69                   | 4116   |

p < 0.0001

| E                  | Non-mutated<br>A + T | SNV<br>≥15%<br>A + T | Totals |
|--------------------|----------------------|----------------------|--------|
| A + T<br>WA/TW     | 3016                 | 80                   | 3096   |
| A + T<br>Non-motif | 2366                 | 34                   | 2400   |
| Total<br>A + T     | 5382                 | 114                  | 5496   |

p < 0.0015

| C                  | Non-mutated<br>C + G | SNV<br>≤1%<br>C + G | Totals |
|--------------------|----------------------|---------------------|--------|
| C + G<br>AID motif | 577                  | 11                  | 588    |
| C + G<br>Non-motif | 3513                 | 15                  | 3528   |
| Total<br>C + G     | 4090                 | 26                  | 4116   |

p < 0.0001

| F                  | Non-mutated<br>A + T | SNV<br>≤1%<br>A + T | Totals |
|--------------------|----------------------|---------------------|--------|
| A + T<br>WA/TW     | 3045                 | 51                  | 3096   |
| A + T<br>Non-motif | 2322                 | 78                  | 2400   |
| Total<br>A + T     | 5367                 | 129                 | 5496   |

p < 0.0011

**Figure AF1. *BCL2* SNV at high and low frequency are consistent with somatic hypermutation patterns.**

Tables A-C detail SNVs at C and G for their consistency with the canonical AID motif, defined as C/G at the underlined base in WRCY/RGYW sites changed to either A/T or G/C. Tables D-F detail SNVs patterns at A and T for their consistency with the *POLH* mutation patterns, defined as A>X or T>X at underlined base in WA/TW sites. Tables A and D show total SNV data, while B and E use only at SNVs at frequencies ≥15%, while C and F use only SNV frequencies at ≤1%. All SNV data show a highly significant and consistent tendency to the AID-mediated mutation patterns, implying that the extremely low frequency SNVs calls represent a biological process and are not due to analytical error. The Fisher's exact one-tailed analysis performed at <http://graphpad.com>.

Table AF2. Evolution of *IGHV* FR1-FR3 sequence from SOLiD data.

| Specimen   | Method<br>SNV*/Total bases | BFAST |    |    | SHRiMP2 |    |    | BSBSn<br>converged |    |    | CUSHAW3 |    |    | CUSHAW3<br>converged |    |    |
|------------|----------------------------|-------|----|----|---------|----|----|--------------------|----|----|---------|----|----|----------------------|----|----|
|            |                            | TP    | FN | FP | TP      | FN | FP | TP                 | FN | FP | TP      | FN | FP | TP                   | FN | FP |
| 128        | 18/274 (10.3%)             | 13    | 5  | 0  | 15      | 3  | 0  | 18                 | 0  | 0  | 18      | 0  | 0  | 18                   | 0  | 0  |
| 134        | 47/280 (16.8%)             | 16    | 31 | 3  | 21      | 26 | 1  | 21                 | 26 | 3  | 30      | 17 | 5  | 38                   | 9  | 5  |
| 136        | 48/286 (16.8%)             | 12    | 36 | 1  | 16      | 32 | 1  | 15                 | 33 | 1  | 37      | 11 | 0  | 42                   | 6  | 1  |
| 132        | 50/280 (17.9%)             | 20    | 30 | 1  | 15      | 35 | 0  | 31                 | 19 | 6  | 16      | 34 | 0  | 40                   | 10 | 0  |
| Method PPV |                            | .92   |    |    | .97     |    |    | .89                |    |    | .95     |    |    | .96                  |    |    |
| Method FNR |                            | .63   |    |    | .59     |    |    | .48                |    |    | .38     |    |    | .15                  |    |    |

\*Single Nucleotide Variation (SNV) from germline determined by Sanger sequencing

TP = total positive base calls

FN = false negative base calls

FP = false positive base calls

Positive predictive rate (PPV) = TP/(TP+FP)

False negative rate (FNR) = FN/SNV
